# Supplementary material for: Clinical Relevance of Viable Circulating Tumor Cells in Patients with Metastatic Colorectal Cancer: The COLOSPOT Prospective Study
Source: MDPI journal article supplement (doi:10.3390/cancers13122966), 2021-06-13
Supplement: s1 [file s1]

Supplementary Materials

# Clinical Relevance of Viable Circulating Tumor Cells in Patients with Metastatic Colorectal Cancer: The COLOSPOT Prospective Study

Thibault Mazard, Laure Cayrefourcq, Françoise Perriard, Hélène Senellart, Benjamin Linot, Christelle De La Fouchardière, Eric Terrebonne, Eric François, Stéphane Obled, Rosine Guimbaud, Laurent Mineur, Marianne Fonck, Jean-Pierre Daurès, Marc Ychou, Eric Assenat and Catherine Alix-Panabières

**Table S1.** Patient and tumor characteristics ( $n = 155$ ).

| Age                                      | Median = 68y [37–84]    |
|------------------------------------------|-------------------------|
| Sex: M / W n(%)                          | 97(63) / 58(37)         |
| Baseline ECOG PS: 0 / 1 / 2 n(%)         | 83(55) / 59(39) / 10(6) |
| CRC location: right/left colon n(%)      | 51(33) / 102(67)        |
| Synchronous/metachronous metastases n(%) | 102(68) / 49(32)        |
| Nb of organs with mets: 1 / >1 n(%)      | 62(41) / 91(59)         |
| Liver mets/no-liver mets n(%)            | 125(82) / 28(18)        |
| Wild type mutant RAS n(%)                | 40(32) / 85(68)         |
| Wild type/mutant B-RAF n(%)              | 123(93) / 9(7)          |
| Normal/ >normal CEA n(%)                 | 44(29) / 108(71)        |

Abbreviations: M, men; W, women; PS, performance status; Nb, number; mets, metastasis; CEA, carcinoembryonic antigen.

**Table S2.** CTC detection at each time point.

| CK19-EPISPOT    |     |            |           |          |        |           | CellSearch®     |           |           |        |           |
|-----------------|-----|------------|-----------|----------|--------|-----------|-----------------|-----------|-----------|--------|-----------|
| Total sample nb |     | ≥1 CTCs    | ≥2 CTCs   | ≥3 CTCs  | Median | [Min-Max] | Total Sample nb | ≥1 CTCs   | ≥3 CTCs   | Median | [Min-Max] |
| D <sub>0</sub>  | 152 | 32(21%)    | 18(11.8%) | 10(6.6%) | 0      | [0-14]    | 150             | 87(58%)   | 59(39,3%) | 1      | [0-302]   |
| D <sub>14</sub> | 149 | 23(15,4%)  | 6(4%)     | 0(0%)    | 0      | [0-2]     |                 |           |           |        |           |
| D <sub>28</sub> | 138 | 17(12,3%)  | 3(2,2%)   | 0(0%)    | 0      | [0-2]     | 138             | 33(23.9%) | 13(9,4%)  | 0      | [0-95]    |
| D <sub>42</sub> | 136 | 13(9.6%)   | 2(1.5%)   | 1(0.7%)  | 0      | [0-7]     |                 |           |           |        |           |
| D <sub>56</sub> | 130 | 15 (11.5%) | 5(3.9%)   | 2(1.5%)  | 0      | [0-28]    |                 |           |           |        |           |

Abbreviations: D, day; CTC, circulating tumor cell.

**Table S3.** Prognostic value of CTCs according to the CK19-EPISPOT assay.

| PFS                   |        |                 |              | OS     |                  |               |
|-----------------------|--------|-----------------|--------------|--------|------------------|---------------|
|                       | n      | Median (months) | p (Log Rank) | n      | Median (months)  | p (Log Rank)  |
| <b>D<sub>0</sub></b>  |        |                 |              |        |                  |               |
| <1/≥1                 | 120/31 | 9.8/9           | 0.21         | 120/32 | 26/28.9          | 0.78          |
| <2/≥2                 | 134/17 | 9.4/9.4         | 0.95         | 134/18 | 25.1/31          | 0.84          |
| <b>D<sub>14</sub></b> |        |                 |              |        |                  |               |
| <1/≥1                 | 126/22 | 8.8/9.3         | 0.47         | 126/23 | 25,7/21          | 0.30          |
| <2/≥2                 | 143/5  | 8.9/8.5         | 0.79         | 143/6  | 25,3/14,7        | 0.12          |
| <b>D<sub>28</sub></b> |        |                 |              |        |                  |               |
| <1/≥1                 | 121/16 | 8.2/7.5         | 0.78         | 121/17 | 24/17,5          | 0.52          |
| <2/≥2                 | 134/3  | <b>8.3/5.8</b>  | <b>0.008</b> | 135/3  | <b>24.8/10.3</b> | <b>0.0003</b> |
| <b>D<sub>42</sub></b> |        |                 |              |        |                  |               |
| <1/≥1                 | 122/13 | 7.9/8           | 0.69         | 123/13 | 24.4/20.2        | 0.54          |
| <2/≥2                 | 133/2  | 7.9/4.6         | 0.22         | 134/2  | <b>24.4/11.3</b> | <b>0.04</b>   |
| <b>D<sub>56</sub></b> |        |                 |              |        |                  |               |
| <1/≥1                 | 114/15 | 7.4/7.6         | 0.86         | 115/15 | 23.9/21.7        | 0.57          |
| <2/≥2                 | 124/5  | 7.6/7.3         | 0.28         | 125/5  | 23.9/21.7        | 0.43          |

Abbreviations: D, day; PFS, progression-free survival; OS, overall survival.
